# Supplementary material for: Ocean Alkalinity Enhancement (OAE) does not cause cellular stress in a phytoplankton community of the sub-tropical Atlantic Ocean
Source: Copernicus journal article supplement (doi:10.5194/egusphere-2024-847), 2024-04-02
Supplement: Supplementary file [file egusphere-2024-847-AC1-supplement.zip]

Nov 15<sup>th</sup>, 2024

Dear Editor,

Please find attached a revised version of the manuscript **egusphere-2024-847** entitled “Ocean Alkalinity Enhancement (OAE) does not cause cellular stress in a phytoplankton community of the sub-tropical Atlantic Ocean”

by By Librada Ramírez <sup>1\*</sup>, Leonardo J. Pozzo-Pirotta <sup>1</sup>, Aja Trebec <sup>2</sup>, Víctor Manzanares-Vázquez <sup>1</sup>, José L. Díez <sup>1</sup>, Javier Arístegui <sup>2</sup>, Ulf Riebesell <sup>3</sup>, Stephen D. Archer <sup>4</sup>, María Segovia <sup>1</sup>

to be considered for publication in ***Biogeosciences*** on the Special issue Environmental impacts of ocean alkalinity enhancement.

We have taken into account all the comments made by the reviewers’ on the previous version, and they have been incorporated in the manuscript. We appreciate their effort and suggestions on the manuscript.

A more extended point-by-point response to reviewers’ comments and description of the modifications are included in the present version.

We thank you for your consideration and look forward hearing from you. If you have any further questions, please do not hesitate to contact me.

Sincerely,

Librada Ramirez  
PhD student  
Department of Ecology  
Faculty of Sciences, Málaga University  
Bld. Louis Pasteur s/n, 29071 Málaga, Spain  
Tel: +34 952 131844  
Email: librada@uma.es
